# Supplementary material for: Community Vertical Composition of the Laguna Negra Hypersaline Microbial Mat, Puna Region (Argentinean Andes)
Source: MDPI journal article supplement (doi:10.3390/biology11060831), 2022-05-28
Supplement: s1 [file s1]

# SUPPLEMENTARY MATERIALS

## Community Vertical Composition of the Laguna Negra Hypersaline Microbial Mat, Puna Region (Argentinean Andes)

Flavia Jaquelina Boidi <sup>1,\*</sup>, Estela Cecilia Mlewski <sup>2</sup>, Guillermo César Fernández <sup>3</sup>, María Regina Flores <sup>4</sup>,  
Emmanuelle Gérard <sup>5</sup>, María Eugenia Farías <sup>6</sup> and Fernando Javier Gomez <sup>3,\*</sup>

<sup>1</sup> Laboratorio de Biología Molecular, Hospital SAMCo Rafaela “Dr. Jaime Ferré”, 737 Lisandro de la Torre, Rafaela 2300, Argentina; flajboidi@gmail.com

<sup>2</sup> Instituto Multidisciplinario de Biología Vegetal (IMBIV), Facultad de Ciencias Exactas, Físicas y Naturales, Universidad Nacional de Córdoba, CONICET, 1666 Vélez Sarsfield Av., Córdoba 5000, Argentina; ecmlewski@imbiv.unc.edu.ar

<sup>3</sup> Centro de Investigaciones en Ciencias de la Tierra (CICTERRA), Facultad de Ciencias Exactas, Físicas y Naturales, Universidad Nacional de Córdoba, CONICET, 1699 Vélez Sarsfield Av., Córdoba 5000, Argentina; guillefernandez.unc@gmail.com (G.C.F.); fjgomez@unc.edu.ar (F.J.G.)

<sup>4</sup> Department of Research and Development, PROMICOL B.V., 12 De Asselen Kuil, Geleen 6161, Netherlands; acm\_regy@hotmail.com

<sup>5</sup> Université de Paris Cité, Institut de physique du globe de Paris, CNRS, F-75005 Paris, France; emgerard@ipgp.fr

<sup>6</sup> Planta Piloto de Procesos Industriales y Microbiológicos (PROIMI), Centro Científico Tecnológico – CONICET, Belgrano Av. & Pasaje Caseros, San Miguel de Tucumán 4000, Argentina; mefarías2009@gmail.com

\* Correspondence: flajboidi@gmail.com (F.J.B.); fjgomez@unc.edu.ar (F.J.G.)

### SUPPLEMENTARY FIGURES

**Supplementary Figure S1.** Observed ASVs rarefaction curve. Rarefaction curves were obtained by multiple repeated sub-sampling (1000 times). For each sampling depth the 1000 calculated value are plotted as circles and the data dispersion is showed in boxplots.

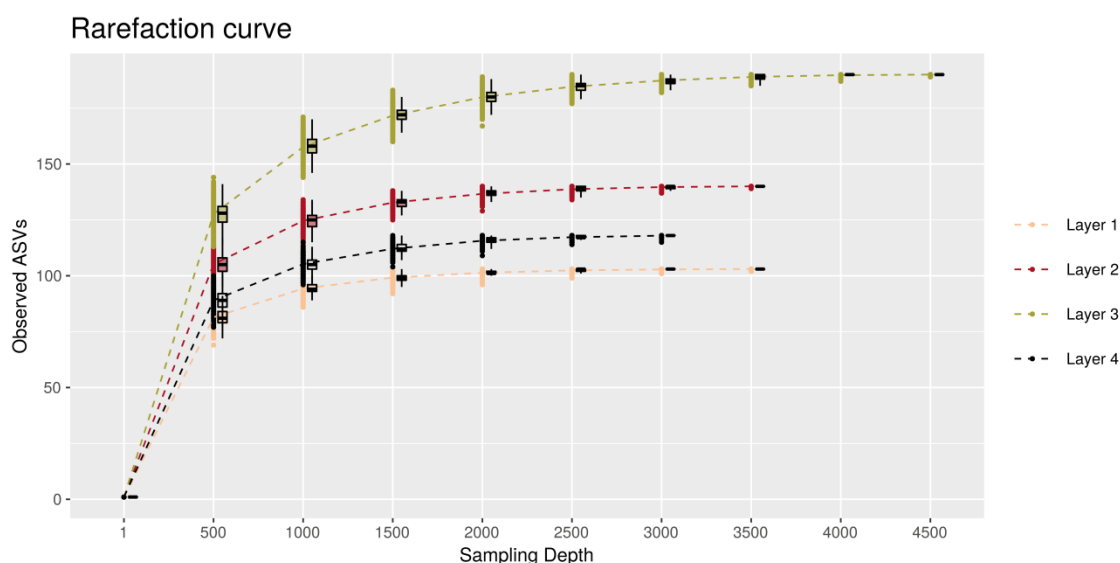

**Supplementary Figure S2.** EDS maps where major elements distribution is visualized. Note Ca as part of aggregates (*Aggr.*), S forming globules (*SG.*) and Si as part of diatoms (*Diat.*).

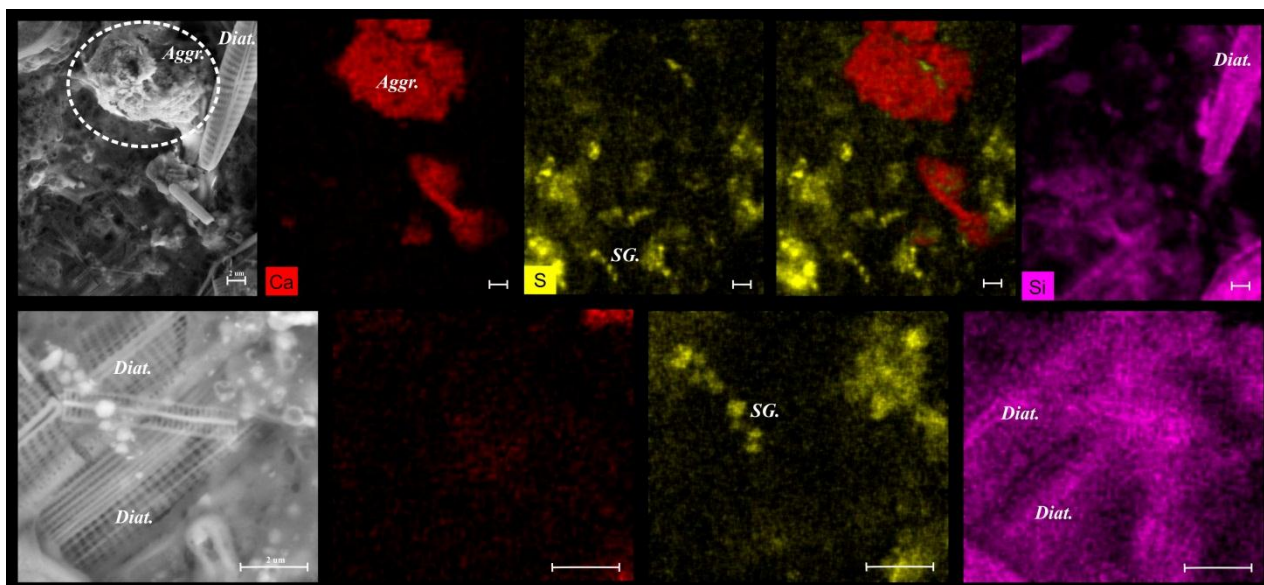

**Supplementary Figure S3.** XRD spectra showing calcite pattern with red lines in all layers.

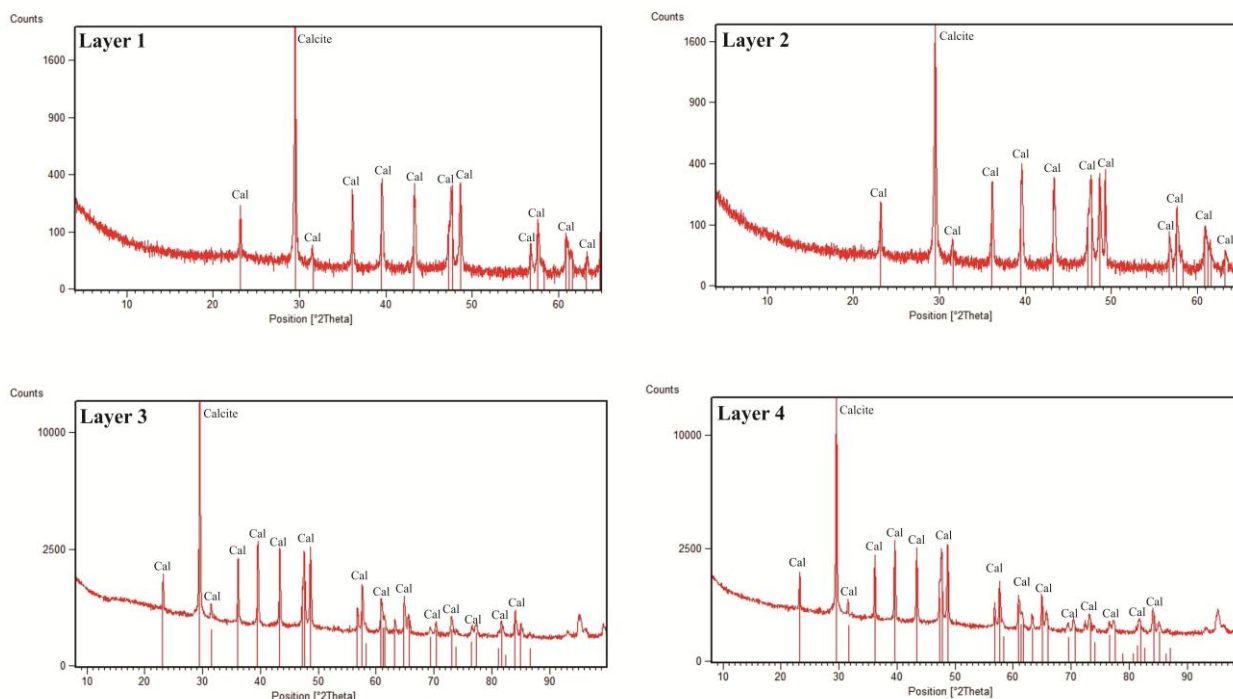

## SUPPLEMENTARY TABLES

**Supplementary Table S1.** Descriptive statistics of Observed ASVs analysis. Values were obtained using a sub-sampling quota of 3000 reads per sample. The sub-sampling routine was performed for 1000 iterations.

| Observed ASVs |      |         |                    |                |                           |
|---------------|------|---------|--------------------|----------------|---------------------------|
| Layer         | N    | Mean    | Standard Deviation | Standard Error | Confident Intervals (95%) |
| 1             | 1000 | 102.830 | 0.4065283          | 0.012855554    | 0.02522699                |
| 2             | 1000 | 139.675 | 0.5794055          | 0.018322410    | 0.03595482                |
| 3             | 1000 | 187.319 | 1.5848504          | 0.050117370    | 0.09834739                |
| 4             | 1000 | 117.941 | 0.2521559          | 0.007973869    | 0.01564745                |

### Non-parametric statistical analysis of Observed ASVs

(Kruskal-Wallis test,  $H_3 = 3862.3082$ ,  $p\text{-value} < 0.0001$ ).

Dunn's test: Layer 1 vs Layer 2 ( $p\text{-value} < 0.0001$ ), Layer 1 vs Layer 3 ( $p\text{-value} < 0.0001$ ), Layer 1 vs Layer 4 ( $p\text{-value} < 0.0001$ ), Layer 2 vs Layer 3 ( $p\text{-value} < 0.0001$ ), Layer 2 vs Layer 4 ( $p\text{-value} < 0.0001$ ), Layer 3 vs Layer 4 ( $p\text{-value} < 0.0001$ ).

**Supplementary Table S2.** Descriptive statistics of Shannon index analysis. Values were obtained using a sub-sampling quota of 3000 reads per sample. The sub-sampling routine was performed for 1000 iterations

| Shannon |      |          |                    |                |                     |
|---------|------|----------|--------------------|----------------|---------------------|
| Layer   | N    | Mean     | Standard Deviation | Standard Error | Confident Intervals |
| 1       | 1000 | 5.451751 | 0.01325192         | 0.0004190624   | 0.0008223434        |
| 2       | 1000 | 5.887495 | 0.01467669         | 0.0004641178   | 0.0009107576        |
| 3       | 1000 | 6.488320 | 0.01911901         | 0.0006045961   | 0.0011864240        |
| 4       | 1000 | 5.452609 | 0.01176552         | 0.0003720584   | 0.0007301056        |

### Non-parametric statistical analysis of Shannon index

(Kruskal-Wallis test,  $H_3 = 3374.5$ ,  $p\text{-value} < 0.0001$ ).

Dunn's test: Layer 1 vs Layer 2 ( $p\text{-value} < 0.0001$ ), Layer 1 vs Layer 3 ( $p\text{-value} < 0.0001$ ), Layer 1 vs Layer 4 ( $p\text{-value} < 0.0001$ ), Layer 2 vs Layer 3 ( $p\text{-value} < 0.0001$ ), Layer 2 vs Layer 4 ( $p\text{-value} < 0.0001$ ), Layer 3 vs Layer 4 ( $p\text{-value} < 0.0001$ ).

**Supplementary Table S3.** Descriptive statistics of Simpson index analysis. Values were obtained using a sub-sampling quota of 3000 reads per sample. The sub-sampling routine was performed for 1000 iterations.

| Simpson |      |           |                    |                |                     |
|---------|------|-----------|--------------------|----------------|---------------------|
| Layer   | N    | Mean      | Standard Deviation | Standard Error | Confident Intervals |
| 1       | 1000 | 0.9591646 | 0.0005086771       | 1.608578e-05   | 3.156580e-05        |
| 2       | 1000 | 0.9608285 | 0.0007163063       | 2.265160e-05   | 4.445017e-05        |
| 3       | 1000 | 0.9803524 | 0.0004251427       | 1.344419e-05   | 2.638210e-05        |
| 4       | 1000 | 0.9434626 | 0.0007591020       | 2.400491e-05   | 4.710583e-05        |

### Non-parametric statistical analysis of Simpson index

(Kruskal-Wallis test,  $H_3 = 3707.6696$ ,  $p\text{-value} < 0.0001$ ).

Dunn's test: Layer 1 vs Layer 2 ( $p\text{-value} < 0.0001$ ), Layer 1 vs Layer 3 ( $p\text{-value} < 0.0001$ ), Layer 1 vs Layer 4 ( $p\text{-value} < 0.0001$ ), Layer 2 vs Layer 3 ( $p\text{-value} < 0.0001$ ), Layer 2 vs Layer 4 ( $p\text{-value} < 0.0001$ ), Layer 3 vs Layer 4 ( $p\text{-value} < 0.0001$ ).

**Supplementary Table S4.** Descriptive statistics of Dominance index analysis. Values were obtained using a sub-sampling quota of 3000 reads per sample. The sub-sampling routine was performed for 1000 iterations.

| Dominance |      |            |                    |                |                     |
|-----------|------|------------|--------------------|----------------|---------------------|
| Layer     | N    | Mean       | Standard Deviation | Standard Error | Confident Intervals |
| 1         | 1000 | 0.04083544 | 0.0005086771       | 1.608578e-05   | 3.156580e-05        |
| 2         | 1000 | 0.03917145 | 0.0007163063       | 2.265160e-05   | 4.445017e-05        |
| 3         | 1000 | 0.01964765 | 0.0004251427       | 1.344419e-05   | 2.638210e-05        |
| 4         | 1000 | 0.05653737 | 0.0007591020       | 2.400491e-05   | 4.710583e-05        |

### Non-parametric statistical analysis of Dominance index

(Kruskal-Wallis test,  $H_3 = 3707.7$ ,  $p\text{-value} < 0.0001$ ).

Dunn's test: Layer 1 vs Layer 2 ( $p\text{-value} < 0.0001$ ), Layer 1 vs Layer 3 ( $p\text{-value} < 0.0001$ ), Layer 1 vs Layer 4 ( $p\text{-value} < 0.0001$ ), Layer 2 vs Layer 3 ( $p\text{-value} < 0.0001$ ), Layer 2 vs Layer 4 ( $p\text{-value} < 0.0001$ ), Layer 3 vs Layer 4 ( $p\text{-value} < 0.0001$ ).

**Supplementary Table S5.** Descriptive statistics of Pielou\_e (J) index analysis. Values were obtained using a sub-sampling quota of 58000 reads per sample. The sub-sampling routine was performed for 1000 iterations.

| Pielou_e (J) |      |           |                    |                |                     |
|--------------|------|-----------|--------------------|----------------|---------------------|
| Layer        | N    | Mean      | Standard Deviation | Standard Error | Confident Intervals |
| 1            | 1000 | 0.8156294 | 0.002054605        | 6.497231e-05   | 0.0001274979        |
| 2            | 1000 | 0.8262090 | 0.002079192        | 6.574983e-05   | 0.0001290236        |
| 3            | 1000 | 0.8594608 | 0.002544751        | 8.047209e-05   | 0.0001579137        |
| 4            | 1000 | 0.7923095 | 0.001698435        | 5.370922e-05   | 0.0001053958        |

### Non-parametric statistical analysis of Pielou\_e (J) index

(Kruskal-Wallis test,  $H_3 = 3749$ ,  $p\text{-value} < 0.0001$ ).

Dunn's test: Layer 1 vs Layer 2 ( $p\text{-value} < 0.0001$ ), Layer 1 vs Layer 3 ( $p\text{-value} < 0.0001$ ), Layer 1 vs Layer 4 ( $p\text{-value} < 0.0001$ ), Layer 2 vs Layer 3 ( $p\text{-value} < 0.0001$ ), Layer 2 vs Layer 4 ( $p\text{-value} < 0.0001$ ), Layer 3 vs Layer 4 ( $p\text{-value} < 0.0001$ ).

**Supplementary Table S6.** Descriptive statistics of Chao1 index analysis. Values were obtained using a sub-sampling quota of 3000 reads per sample. The sub-sampling routine was performed for 1000 iterations.

| Chao1 |      |          |                    |                |                     |
|-------|------|----------|--------------------|----------------|---------------------|
| Layer | N    | Mean     | Standard Deviation | Standard Error | Confident Intervals |
| 1     | 1000 | 103.0906 | 0.6621615          | 0.02093939     | 0.04109023          |
| 2     | 1000 | 140.2106 | 0.8781844          | 0.02777063     | 0.05449546          |
| 3     | 1000 | 191.0313 | 2.8453931          | 0.08997923     | 0.17656997          |
| 4     | 1000 | 118.0717 | 0.3468058          | 0.01096696     | 0.02152092          |

### Non-parametric statistical analysis of Chao 1 index

(Kruskal-Wallis test,  $H_3 = 3749.1$ ,  $p\text{-value} < 0.0001$ ).

Dunn's test: Layer 1 vs Layer 2 ( $p\text{-value} < 0.0001$ ), Layer 1 vs Layer 3 ( $p\text{-value} < 0.0001$ ), Layer 1 vs Layer 4 ( $p\text{-value} < 0.0001$ ), Layer 2 vs Layer 3 ( $p\text{-value} < 0.0001$ ), Layer 2 vs Layer 4 ( $p\text{-value} < 0.0001$ ), Layer 3 vs Layer 4 ( $p\text{-value} < 0.0001$ ).

**Supplementary Table S7.** Most abundant ASVs (>0.02 relative abundance) per layer classified at the lowest possible taxonomic level. Known genera are highlighted in bold.

| ASV | Layer | Relative abundance | Silva predicted taxonomy |                                                                                                 | NCBI best BLAST match (Accession Number)           | Identity | Isolation source                                   | Reference |
|-----|-------|--------------------|--------------------------|-------------------------------------------------------------------------------------------------|----------------------------------------------------|----------|----------------------------------------------------|-----------|
| 01  | 1     | 0.00               | Bacteria                 | Phylum Halanaerobiaeota                                                                         | Uncultured <i>Halanaerobium</i> sp. (FM879119.1)   | 100 %    | Hyperhaline lake sediment, Salar de Ascotán, Chile | [53]      |
|     | 2     | 0.03               |                          | Class Halanaerobiia                                                                             |                                                    |          |                                                    |           |
|     | 3     | 0.05               |                          | Order Halanaerobiales                                                                           |                                                    |          |                                                    |           |
|     | 4     | 0.19               |                          | Family Halanaerobiaceae<br>Genus <b><i>Halanaerobium</i></b><br>Species Unknown                 |                                                    |          |                                                    |           |
| 02  | 1     | 0.00               | Bacteria                 | Phylum Thermotogae                                                                              | Uncultured organism clone SBYH_2623 (JN455679.1)   | 98.8 %   | Hypersaline microbial mat, Guerrero Negro, Mexico  | [41]      |
|     | 2     | 0.02               |                          | Class Thermotogae                                                                               |                                                    |          |                                                    |           |
|     | 3     | 0.04               |                          | Order Petrotogales                                                                              |                                                    |          |                                                    |           |
|     | 4     | 0.03               |                          | Family Petrotogaceae<br>Genus SC103<br>Species Uncultured organism                              |                                                    |          |                                                    |           |
| 03  | 1     | 0.04               | Bacteria                 | Phylum Proteobacteria                                                                           | Uncultured bacterium clone ProA23S_19 (GQ915826.1) | 95.6 %   | Marine water, Gulf of Mexico, USA                  | [54]      |
|     | 2     | 0.00               |                          | Class Alphaproteobacteria                                                                       |                                                    |          |                                                    |           |
|     | 3     | 0.00               |                          | Order Rickettsiales                                                                             |                                                    |          |                                                    |           |
|     | 4     | 0.00               |                          | Family Unknown<br>Genus Unknown<br>Species Unknown                                              |                                                    |          |                                                    |           |
| 04  | 1     | 0.01               | Bacteria                 | Phylum Patescibacteria                                                                          | Uncultured organism clone SBXZ_5580 (JN436702.1)   | 99.2 %   | Hypersaline microbial mat, Guerrero Negro, Mexico  | [41]      |
|     | 2     | 0.04               |                          | Class Gracilibacteria                                                                           |                                                    |          |                                                    |           |
|     | 3     | 0.00               |                          | Order Absconditabacteriales (SR1)                                                               |                                                    |          |                                                    |           |
|     | 4     | 0.00               |                          | Family Unknown<br>Genus Unknown<br>Species Unknown                                              |                                                    |          |                                                    |           |
| 05  | 1     | 0.03               | Bacteria                 | Phylum Verrucomicrobia                                                                          | Uncultured bacterium clone 59_1854298 (LT720392.1) | 100 %    | Marine water, Rio de Janeiro, Brazil               | [55]      |
|     | 2     | 0.00               |                          | Class Verrucomicrobiae                                                                          |                                                    |          |                                                    |           |
|     | 3     | 0.01               |                          | Order Opitutales                                                                                |                                                    |          |                                                    |           |
|     | 4     | 0.00               |                          | Family Puniceicoccaceae<br>Genus <b><i>Lentimonas</i></b><br>Species Uncultured Verrucomicrobia |                                                    |          |                                                    |           |
| 06  | 1     | 0.00               | Bacteria                 | Phylum Proteobacteria                                                                           | Uncultured organism clone SBYH_6277 (JN459997.1)   | 99.6 %   | Hypersaline microbial mat, Guerrero Negro, Mexico  | [41]      |
|     | 2     | 0.01               |                          | Class Deltaproteobacteria                                                                       |                                                    |          |                                                    |           |
|     | 3     | 0.07               |                          | Order Oligoflexales                                                                             |                                                    |          |                                                    |           |
|     | 4     | 0.03               |                          | Family 0319-6G20<br>Genus Unknown<br>Species Unknown                                            |                                                    |          |                                                    |           |

**Supplementary Table S7.** Most abundant ASVs (>0.02 relative abundance) per layer classified at the lowest possible taxonomic level. Known genera are highlighted in bold. (continued)

| ASV | Layer | Relative abundance | Silva predicted taxonomy |                                                                                           | NCBI best BLAST match (Accession Number)                                       | Identity | Isolation source                                                 | Reference |
|-----|-------|--------------------|--------------------------|-------------------------------------------------------------------------------------------|--------------------------------------------------------------------------------|----------|------------------------------------------------------------------|-----------|
| 07  | 1     | 0.08               | Bacteria                 | Phylum Deinococcus-Thermus                                                                | Uncultured bacterium clone PET4-24 (MG949154.1)                                | 99.6 %   | Hypersaline microbial mat, Sečovlje Salina, Slovenia             | [56]      |
|     | 2     | 0.00               |                          | Class Deinococci                                                                          |                                                                                |          |                                                                  |           |
|     | 3     | 0.00               |                          | Order Deinococcales                                                                       |                                                                                |          |                                                                  |           |
|     | 4     | 0.00               |                          | Family Trueperaceae<br>Genus <b>Truepera</b><br>Species Uncultured organism               |                                                                                |          |                                                                  |           |
| 08  | 1     | 0.05               | Bacteria                 | Phylum Patescibacteria                                                                    | Uncultured candidate division SR1 bacterium clone Elkhorn-918R-1A (JF917294.1) | 98.8 %   | Elkhorn slough, California, USA                                  | [57]      |
|     | 2     | 0.03               |                          | Class Gracilibacteria                                                                     |                                                                                |          |                                                                  |           |
|     | 3     | 0.00               |                          | Order Absconditabacteriales (SR1)                                                         |                                                                                |          |                                                                  |           |
|     | 4     | 0.00               |                          | Family Uncultured bacterium<br>Genus Uncultured bacterium<br>Species Uncultured bacterium |                                                                                |          |                                                                  |           |
| 09  | 1     | 0.00               | Bacteria                 | Phylum Planctomycetes                                                                     | Uncultured organism clone SBZC_540 (JN508204.1)                                | 98 %     | Hypersaline microbial mat, Guerrero Negro, Mexico                | [41]      |
|     | 2     | 0.02               |                          | Class SGST604                                                                             |                                                                                |          |                                                                  |           |
|     | 3     | 0.00               |                          | Order Uncultured organism                                                                 |                                                                                |          |                                                                  |           |
|     | 4     | 0.03               |                          | Family Uncultured organism<br>Genus Uncultured organism<br>Species Uncultured organism    |                                                                                |          |                                                                  |           |
| 10  | 1     | 0.00               | Bacteria                 | Phylum Spirochaetes                                                                       | Uncultured organism clone SBYO_2277 (JN466486.1)                               | 99.6 %   | Hypersaline microbial mat, Guerrero Negro, Mexico                | [41]      |
|     | 2     | 0.01               |                          | Class Leptospirae                                                                         |                                                                                |          |                                                                  |           |
|     | 3     | 0.03               |                          | Order Leptospirales                                                                       |                                                                                |          |                                                                  |           |
|     | 4     | 0.02               |                          | Family Leptospiraceae<br>Genus Uncultured<br>Species Uncultured organism                  |                                                                                |          |                                                                  |           |
| 11  | 1     | 0.00               | Bacteria                 | Phylum Thermotogae                                                                        | Uncultured organism clone SBXZ_2085 (JN432239.1)                               | 98.8 %   | Hypersaline microbial mat, Guerrero Negro, Mexico                | [41]      |
|     | 2     | 0.00               |                          | Class Thermotogae                                                                         |                                                                                |          |                                                                  |           |
|     | 3     | 0.03               |                          | Order Petrotogales                                                                        |                                                                                |          |                                                                  |           |
|     | 4     | 0.00               |                          | Family Petrotogaceae<br>Genus SC103<br>Species Uncultured organism                        |                                                                                |          |                                                                  |           |
| 12  | 1     | 0.00               | Bacteria                 | Phylum Patescibacteria                                                                    | Uncultured eubacterium WCHA2-26 (AF050609.1)                                   | 93.2 %   | Contaminated aquifer, Michigan, USA                              | [58]      |
|     | 2     | 0.00               |                          | Class Gracilibacteria                                                                     |                                                                                |          |                                                                  |           |
|     | 3     | 0.02               |                          | Order Absconditabacteriales (SR1)                                                         |                                                                                |          |                                                                  |           |
|     | 4     | 0.00               |                          | Family Unknown<br>Genus Unknown<br>Species Unknown                                        |                                                                                |          |                                                                  |           |
| 13  | 1     | 0.00               | Bacteria                 | Phylum Planctomycetes                                                                     | Uncultured bacterium clone Kasin-B1-B10 (HE604774.1)                           | 92 %     | Hypersaline sediment, Lake Kasin, Russia                         | [59]      |
|     | 2     | 0.00               |                          | Class Unknown                                                                             |                                                                                |          |                                                                  |           |
|     | 3     | 0.00               |                          | Order Unknown                                                                             |                                                                                |          |                                                                  |           |
|     | 4     | 0.02               |                          | Family Unknown<br>Genus Unknown<br>Species Unknown                                        |                                                                                |          |                                                                  |           |
| 14  | 1     | 0.04               | Bacteria                 | Phylum Bacteroidetes                                                                      | Uncultured bacterium clone wat-80 (KC508773.1)                                 | 88.1 %   | Seawater, Tateyama, Japan                                        | [60]      |
|     | 2     | 0.04               |                          | Class Bacteroidia                                                                         |                                                                                |          |                                                                  |           |
|     | 3     | 0.00               |                          | Order Unknown                                                                             |                                                                                |          |                                                                  |           |
|     | 4     | 0.00               |                          | Family Unknown<br>Genus Unknown<br>Species Unknown                                        |                                                                                |          |                                                                  |           |
| 15  | 1     | 0.00               | Bacteria                 | Phylum Patescibacteria                                                                    | Uncultured bacterium clone OM_int_bact086 (KY342779.1)                         | 99.6 %   | Hypersaline intertidal microbial mats, Gulf of Oman, Arabian Sea | [61]      |
|     | 2     | 0.01               |                          | Class Gracilibacteria                                                                     |                                                                                |          |                                                                  |           |
|     | 3     | 0.03               |                          | Order Candidatus Peregrinibacteria                                                        |                                                                                |          |                                                                  |           |
|     | 4     | 0.02               |                          | Family Unknown<br>Genus Unknown<br>Species Unknown                                        |                                                                                |          |                                                                  |           |
| 16  | 1     | 0.00               | Bacteria                 | Phylum Halanaerobiaeota                                                                   | Uncultured bacterium clone Kasin-B2-F08 (HE604688.1)                           | 99.6 %   | Hypersaline sediment, Lake Kasin, Russia                         | [59]      |
|     | 2     | 0.00               |                          | Class Halanaerobiia                                                                       |                                                                                |          |                                                                  |           |
|     | 3     | 0.03               |                          | Order Halanaerobiales                                                                     |                                                                                |          |                                                                  |           |
|     | 4     | 0.09               |                          | Family Halanaerobiaceae<br>Genus <b>Halanaerobium</b><br>Species bacterium YC-ZSS-LKJ30   |                                                                                |          |                                                                  |           |

**Supplementary Table S7.** Most abundant ASVs (>0.02 relative abundance) per layer classified at the lowest possible taxonomic level. Known genera are highlighted in bold. (continued)

| ASV | Layer | Relative abundance | Silva predicted taxonomy |                                                                                           | NCBI best BLAST match (Accession Number)                               | Identity | Isolation source                                     | Reference |
|-----|-------|--------------------|--------------------------|-------------------------------------------------------------------------------------------|------------------------------------------------------------------------|----------|------------------------------------------------------|-----------|
| 17  | 1     | 0.00               | Bacteria                 | Phylum Epsilonbacteraeota                                                                 | Uncultured organism clone SBZP_5796 (JN538963.1)                       | 99.6 %   | Hypersaline microbial mat, Guerrero Negro, Mexico    | [41]      |
|     | 2     | 0.02               |                          | Class Campylobacteria                                                                     |                                                                        |          |                                                      |           |
|     | 3     | 0.00               |                          | Order Campylobacterales                                                                   |                                                                        |          |                                                      |           |
|     | 4     | 0.00               |                          | Family Helicobacteraceae<br>Genus Uncultured<br>Species Uncultured organism               |                                                                        |          |                                                      |           |
| 18  | 1     | 0.07               | Bacteria                 | Phylum Deinococcus-Thermus                                                                | Uncultured bacterium clone Hua-w/2-88 (EF632878.2)                     | 100 %    | Hypersaline water, Salar de Huasco, Chile            | [62]      |
|     | 2     | 0.00               |                          | Class Deinococci                                                                          |                                                                        |          |                                                      |           |
|     | 3     | 0.00               |                          | Order Deinococcales                                                                       |                                                                        |          |                                                      |           |
|     | 4     | 0.00               |                          | Family Trueperaceae<br>Genus <b>Truepera</b><br>Species Uncultured bacterium              |                                                                        |          |                                                      |           |
| 19  | 1     | 0.00               | Bacteria                 | Phylum Atribacteria                                                                       | Uncultured organism clone SBYZ_1653 (JN496325.1)                       | 99.2 %   | Hypersaline microbial mat, Guerrero Negro, Mexico    | [41]      |
|     | 2     | 0.00               |                          | Class JS1                                                                                 |                                                                        |          |                                                      |           |
|     | 3     | 0.01               |                          | Order Uncultured organism                                                                 |                                                                        |          |                                                      |           |
|     | 4     | 0.04               |                          | Family Uncultured organism<br>Genus Uncultured organism<br>Species Uncultured organism    |                                                                        |          |                                                      |           |
| 20  | 1     | 0.00               | Bacteria                 | Phylum Halanaerobiaeota                                                                   | <i>Halanaerobium praevalens</i> strain GSL (NR_074859.1)               | 100 %    | Great Salt Lake sediment, Utah, USA                  | [63]      |
|     | 2     | 0.02               |                          | Class Halanaerobiiia                                                                      |                                                                        |          |                                                      |           |
|     | 3     | 0.00               |                          | Order Halanaerobiales                                                                     |                                                                        |          |                                                      |           |
|     | 4     | 0.03               |                          | Family Halanaerobiaceae<br>Genus <b>Halanaerobium</b><br>Species Unknown                  |                                                                        |          |                                                      |           |
| 21  | 1     | 0.00               | Bacteria                 | Phylum Chloroflexi                                                                        | Uncultured bacterium clone 1109S3_C07_115 (AB785865.1)                 | 98.4 %   | Coastal microbial mats, Schiermonnikoog, Netherlands | [64]      |
|     | 2     | 0.15               |                          | Class Chloroflexia                                                                        |                                                                        |          |                                                      |           |
|     | 3     | 0.02               |                          | Order Chloroflexales                                                                      |                                                                        |          |                                                      |           |
|     | 4     | 0.00               |                          | Family Chloroflexaceae<br>Genus Candidatus <b>Chlorothrix</b><br>Species Unknown          |                                                                        |          |                                                      |           |
| 22  | 1     | 0.12               | Bacteria                 | Phylum Bacteroidetes                                                                      | Uncultured organism clone SBXZ_4804 (JN435991.1)                       | 97.6 %   | Hypersaline microbial mat, Guerrero Negro, Mexico    | [41]      |
|     | 2     | 0.00               |                          | Class Bacteroidia                                                                         |                                                                        |          |                                                      |           |
|     | 3     | 0.00               |                          | Order Chitinophagales                                                                     |                                                                        |          |                                                      |           |
|     | 4     | 0.00               |                          | Family Uncultured<br>Genus Uncultured organism<br>Species Uncultured organism             |                                                                        |          |                                                      |           |
| 23  | 1     | 0.00               | Bacteria                 | Phylum Unknown                                                                            | Uncultured bacterium clone 1109S3_E03_088 (AB784120.1)                 | 95.7 %   | Coastal microbial mats, Schiermonnikoog, Netherlands | [64]      |
|     | 2     | 0.06               |                          | Class Unknown                                                                             |                                                                        |          |                                                      |           |
|     | 3     | 0.01               |                          | Order Unknown                                                                             |                                                                        |          |                                                      |           |
|     | 4     | 0.00               |                          | Family Unknown<br>Genus Unknown<br>Species Unknown                                        |                                                                        |          |                                                      |           |
| 24  | 1     | 0.03               | Bacteria                 | Phylum Cyanobacteria                                                                      | Uncultured bacterium clone cafs740 (MF439907.1)                        | 90.8 %   | Floodplain lake water, Lago Grande do Curuai, Brazil | [65]      |
|     | 2     | 0.00               |                          | Class Sericytochromatia                                                                   |                                                                        |          |                                                      |           |
|     | 3     | 0.00               |                          | Order Uncultured bacterium                                                                |                                                                        |          |                                                      |           |
|     | 4     | 0.00               |                          | Family Uncultured bacterium<br>Genus Uncultured bacterium<br>Species Uncultured bacterium |                                                                        |          |                                                      |           |
| 25  | 1     | 0.06               | Bacteria                 | Phylum Verrucomicrobia                                                                    | Uncultured organism clone SBYO_1345 (JN465675.1)                       | 98.8 %   | Hypersaline microbial mat, Guerrero Negro, Mexico    | [41]      |
|     | 2     | 0.05               |                          | Class Verrucomicrobiae                                                                    |                                                                        |          |                                                      |           |
|     | 3     | 0.01               |                          | Order Methylocaldiphilales                                                                |                                                                        |          |                                                      |           |
|     | 4     | 0.00               |                          | Family Methylocaldiphilaceae<br>Genus Uncultured<br>Species Uncultured                    |                                                                        |          |                                                      |           |
| 26  | 1     | 0.06               | Bacteria                 | Phylum Bacteroidetes                                                                      | Uncultured bacterium clone 108280New.CleanUp.RefO TU12935 (MF995916.1) | 96 %     | Mediterranean thalassohaline lake                    | [66]      |
|     | 2     | 0.00               |                          | Class Bacteroidia                                                                         |                                                                        |          |                                                      |           |
|     | 3     | 0.00               |                          | Order Cytophagales                                                                        |                                                                        |          |                                                      |           |
|     | 4     | 0.00               |                          | Family Flammeovirgaceae<br>Genus <b>Flexithrix</b><br>Species Uncultured organism         |                                                                        |          |                                                      |           |

**Supplementary Table S7.** Most abundant ASVs (>0.02 relative abundance) per layer classified at the lowest possible taxonomic level. Known genera are highlighted in bold. (continued)

| ASV       | Layer | Relative abundance | Silva predicted taxonomy |                                                                              | NCBI best BLAST match (Accession Number)         | Identity | Isolation source                                  | Reference |
|-----------|-------|--------------------|--------------------------|------------------------------------------------------------------------------|--------------------------------------------------|----------|---------------------------------------------------|-----------|
| <b>27</b> | 1     | 0.00               | Bacteria                 | Phylum Proteobacteria                                                        | Uncultured organism clone SBZP_879 (JN535274.1)  | 99.6 %   | Hypersaline microbial mat, Guerrero Negro, Mexico | [41]      |
|           | 2     | 0.01               |                          | Class Deltaproteobacteria                                                    |                                                  |          |                                                   |           |
|           | 3     | 0.03               |                          | Order Oligoflexales                                                          |                                                  |          |                                                   |           |
|           | 4     | 0.01               |                          | Family 0319-6G20<br>Genus Uncultured organism<br>Species Uncultured organism |                                                  |          |                                                   |           |
| <b>28</b> | 1     | 0.00               | Bacteria                 | Phylum Thermotogae                                                           | Uncultured organism clone SBXZ_2085 (JN432239.1) | 99.2 %   | Hypersaline microbial mat, Guerrero Negro, Mexico | [41]      |
|           | 2     | 0.00               |                          | Class Thermotogae                                                            |                                                  |          |                                                   |           |
|           | 3     | 0.00               |                          | Order Petrotogales                                                           |                                                  |          |                                                   |           |
|           | 4     | 0.02               |                          | Family Petrotogaceae<br>Genus SC103<br>Species Uncultured organism           |                                                  |          |                                                   |           |
